# Supplementary material for: Automatic Detection of Prostate Tumor Habitats using Diffusion MRI
Source: PubMed Central journal article supplement (PMC6235961; doi:10.1038/s41598-018-34916-4), 2018-11-14
Supplement: 41598_2018_34916_MOESM1_ESM.pdf [file 41598_2018_34916_MOESM1_ESM.pdf]

## Automatic Detection of Prostate Tumor Habitats using Diffusion MRI

Yohann Tschudi, Ph.D., Alan Pollack, M.D., Ph.D., Sanoj Punnen, M.D., John C. Ford, Ph.D., Yu-Cherng Chang, B.S., Nachiketh Soodana-Prakash, M.D., Adrian L. Breto, B.S., Deukwoo Kwon, Ph.D., Felipe Munera, M.D., Matthew C. Abramowitz, M.D., Oleksandr N. Kryvenko, M.D., Radka Stoyanova, Ph.D.

**Supplementary Table 1.** Summary of radical prostatectomy ROIs.

| Patient | ROI | Location | Volume | GS pattern | GS |
|---------|-----|----------|--------|------------|----|
| 1       | 1   | TZ       | 0.38   | 3+3        | 6  |
| 1       | 2   | TZ       | 0      | 3+3        | 6  |
| 2       | 1   | TZ       | 3.61   | 3+4        | 7  |
| 2       | 2   | PZ       | 0.31   | 3+3        | 6  |
| 2       | 3   | PZ       | 3.46   | 3+4        | 7  |
| 2       | 4   | PZ       | 0.51   | 3+3        | 6  |
| 3       | 1   | PZ       | 1.2    | 4+5        | 9  |
| 3       | 2   | PZ       | 1.29   | 3+4        | 7  |
| 3       | 3   | TZ       | 0.18   | 3+3        | 6  |
| 3       | 4   | TZ       | 0.69   | 3+4        | 7  |
| 4       | 1   | TZ       | 43.84  | 5+5        | 10 |
| 4       | 2   | PZ       | 0.68   | 3+3        | 6  |
| 5       | 1   | TZ       | 3.57   | 3+4        | 7  |
| 5       | 2   | PZ       | 0.34   | 3+3        | 6  |
| 5       | 3   | TZ       | 0.18   | 3+3        | 6  |
| 5       | 4   | TZ       | 0      | 3+4        | 7  |
| 5       | 5   | TZ       | 0.37   | 3+4        | 7  |
| 5       | 6   | PZ       | 0.06   | 3+3        | 6  |
| 6       | 1   | TZ       | 6.37   | 4+5        | 9  |
| 6       | 2   | TZ       | 0.29   | 3+3        | 6  |
| 6       | 3   | PZ       | 0.263  | 3+4        | 7  |
| 7       | 1   | TZ       | 2.48   | 4+5        | 9  |
| 7       | 2   | PZ       | 0.87   | 3+4        | 7  |
| 7       | 3   | PZ       | 0.64   | 3+4        | 7  |
| 8       | 1   | TZ       | 2.16   | 3+4        | 7  |
| 8       | 2   | PZ       | 0.54   | 3+3        | 6  |
| 8       | 3   | PZ       | 0.36   | 3+3        | 6  |
| 9       | 1   | TZ       | 6.63   | 4+5        | 9  |
| 10      | 1   | TZ       | 7.42   | 3+4        | 7  |
| 10      | 2   | TZ       | 0.27   | 3+3        | 6  |
| 10      | 3   | PZ       | 0.68   | 3+3        | 6  |
| 10      | 4   | PZ       | 0.27   | 3+3        | 6  |

| Patient | ROI | Location | Volume | GS pattern | GS |
|---------|-----|----------|--------|------------|----|
| 11      | 1   | PZ       | 1.98   | 3+4        | 7  |
| 11      | 2   | PZ       | 0.63   | 3+4        | 7  |
| 11      | 3   | TZ       | 0.39   | 3+3        | 6  |
| 11      | 4   | PZ       | 0.2    | 3+3        | 6  |
| 11      | 5   | TZ       | 0.07   | 3+3        | 6  |
| 12      | 1   | PZ       | 0.59   | 3+4        | 7  |
| 12      | 2   | PZ       | 0.31   | 3+3        | 6  |
| 12      | 3   | PZ       | 0.21   | 3+3        | 6  |
| 13      | 1   | TZ       | 4.72   | 4+5        | 9  |
| 14      | 1   | PZ       | 0.76   | 3+4        | 7  |
| 14      | 2   | TZ       | 0.75   | 3+3        | 6  |
| 14      | 3   | PZ       | 0      | 3+3        | 6  |
| 14      | 4   | PZ       | 0.23   | 3+3        | 6  |
| 15      | 1   | PZ       | 1.44   | 5+4        | 9  |
| 15      | 2   | TZ       | 0.22   | 3+3        | 6  |
| 16      | 1   | TZ       | 7.83   | 4+5        | 9  |
| 16      | 2   | PZ       | 0.35   | 3+4        | 7  |
| 17      | 1   | TZ       | 2.55   | 3+4        | 7  |
| 17      | 2   | TZ       | 0.51   | 3+3        | 6  |
| 17      | 3   | PZ       | 0.22   | 3+3        | 6  |
| 18      | 1   | PZ       | 1.08   | 4+4        | 8  |

**Supplementary Table S2.** ADC thresholds for determining volumes at high risk (PZ/TZ=900/800  $\mu\text{m}^2/\text{s}$ )

| PZ  | TZ | Statistics                                  | 700      | 750      | 800       | 850       | 900       | 950       | 1000      |
|-----|----|---------------------------------------------|----------|----------|-----------|-----------|-----------|-----------|-----------|
| 600 |    | Spearman's $\rho$                           | 0.442    | 0.504    | 0.526     | 0.536     | 0.583     | 0.516     | 0.478     |
|     |    | p-value                                     | 9.28E-04 | 1.20E-04 | 5.13E-05  | 3.51E-05  | 4.65E-06  | 7.60E-05  | 2.95E-04  |
|     |    | Volume  (cc)                                | 0.038    | 0.044    | 0.058     | 0.069     | 0.085     | 0.108     | 0.142     |
|     |    | True Positive/False Negative/False Positive | 5/48/0   | 5/48/1   | 10/43/1   | 11/42/1   | 11/42/2   | 11/42/5   | 12/42/7   |
|     |    | Pearson's r                                 | 0.852    | 0.851    | 0.889     | 0.882     | 0.88      | 0.91      | 0.9       |
|     |    | GS True Positive / GS False Positive        | 8/6.73   | 8/6.73   | 7.3/6.74  | 7.27/6.74 | 7.27/6.74 | 7/6.81    | 7/6.81    |
| 650 |    | Spearman's $\rho$                           | 0.502    | 0.555    | 0.577     | 0.591     | 0.631     | 0.571     | 0.494     |
|     |    | p-value                                     | 1.30E-04 | 1.60E-05 | 6.08E-06  | 3.13E-06  | 3.99E-07  | 8.05E-06  | 1.68E-04  |
|     |    | Volume  (cc)                                | 0.063    | 0.069    | 0.083     | 0.094     | 0.110     | 0.133     | 0.166     |
|     |    | True Positive/False Negative/False Positive | 5/48/1   | 5/48/2   | 10/43/2   | 11/42/2   | 12/41/2   | 12/41/5   | 12/42/8   |
|     |    | Pearson's r                                 | 0.896    | 0.896    | 0.912     | 0.904     | 0.887     | 0.907     | 0.909     |
|     |    | GS True Positive / GS False Positive        | 8/6.73   | 8/6.73   | 7.3/6.74  | 7.27/6.74 | 7.42/6.68 | 7.17/6.76 | 7/6.81    |
| 700 |    | Spearman's $\rho$                           |          | 0.608    | 0.641     | 0.641     | 0.688     | 0.625     | 0.559     |
|     |    | p-value                                     |          | 1.38E-06 | 2.31E-07  | 2.31E-07  | 1.26E-08  | 5.60E-07  | 1.33E-05  |
|     |    | Volume  (cc)                                |          | 0.118    | 0.133     | 0.143     | 0.160     | 0.184     | 0.217     |
|     |    | True Positive/False Negative/False Positive |          | 5/48/4   | 12/41/4   | 12/41/4   | 14/39/3   | 14/39/5   | 15/39/6   |
|     |    | Pearson's r                                 |          | 0.899    | 0.884     | 0.889     | 0.871     | 0.895     | 0.884     |
|     |    | GS True Positive / GS False Positive        |          | 8.6/6.67 | 7.5/6.66  | 7.5/6.66  | 7.71/6.54 | 7.5/6.62  | 7.47/6.62 |
| 750 |    | Spearman's $\rho$                           |          |          | 0.593     | 0.598     | 0.651     | 0.621     | 0.574     |
|     |    | p-value                                     |          |          | 2.92E-06  | 2.31E-06  | 1.30E-07  | 7.19E-07  | 6.96E-06  |
|     |    | Volume  (cc)                                |          |          | 0.208     | 0.219     | 0.235     | 0.258     | 0.292     |
|     |    | True Positive/False Negative/False Positive |          |          | 18/36/3   | 17/37/4   | 17/37/5   | 19/35/6   | 20/35/8   |
|     |    | Pearson's r                                 |          |          | 0.87      | 0.884     | 0.888     | 0.887     | 0.881     |
|     |    | GS True Positive / GS False Positive        |          |          | 7.72/6.47 | 7.71/6.51 | 7.71/6.51 | 7.58/6.51 | 7.55/6.51 |
| 800 |    | Spearman's $\rho$                           |          |          |           | 0.727     | 0.771     | 0.737     | 0.659     |
|     |    | p-value                                     |          |          |           | 6.88E-10  | 1.49E-11  | 3.09E-10  | 8.20E-08  |
|     |    | Volume  (cc)                                |          |          |           | 0.350     | 0.367     | 0.391     | 0.427     |
|     |    | True Positive/False Negative/False Positive |          |          |           | 18/36/2   | 17/37/4   | 20/34/5   | 20/35/8   |
|     |    | Pearson's r                                 |          |          |           | 0.889     | 0.903     | 0.896     | 0.893     |
|     |    | GS True Positive / GS False Positive        |          |          |           | 7.72/6.47 | 7.71/6.51 | 7.6/6.47  | 7.55/6.51 |
| 850 |    | Spearman's $\rho$                           |          |          |           |           | 0.745     | 0.701     | 0.666     |
|     |    | p-value                                     |          |          |           |           | 1.54E-10  | 5.06E-09  | 5.34E-08  |
|     |    | Volume  (cc)                                |          |          |           |           | 0.524     | 0.549     | 0.584     |
|     |    | True Positive/False Negative/False Positive |          |          |           |           | 19/35/4   | 23/33/5   | 21/34/9   |
|     |    | Pearson's r                                 |          |          |           |           | 0.904     | 0.89      | 0.901     |
|     |    | GS True Positive / GS False Positive        |          |          |           |           | 7.79/6.4  | 7.65/6.39 | 7.62/6.44 |
| 900 |    | Spearman's $\rho$                           |          |          |           |           |           | 0.684     | 0.667     |
|     |    | p-value                                     |          |          |           |           |           | 1.63E-08  | 5.07E-08  |
|     |    | Volume  (cc)                                |          |          |           |           |           | 0.727     | 0.765     |
|     |    | True Positive/False Negative/False Positive |          |          |           |           |           | 24/33/5   | 24/32/6   |
|     |    | Pearson's r                                 |          |          |           |           |           | 0.916     | 0.912     |
|     |    | GS True Positive / GS False Positive        |          |          |           |           |           | 7.67/6.42 | 7.62/6.41 |

The following six parameters were calculated for each tested pair of PZ/TZ thresholds:

1. Spearman correlation coefficient  $\rho$  between the size of the resultant VOIs and GS of the corresponding RP lesion;
2. P-value of the Spearman's  $\rho$ ;
3. Average volume of VOIs;
4. True positive = VOI is matching RP lesion; False negative = there is no VOI that matches the RP lesion; False positive = there is no RP lesion that matches the VOI;
5. Pearson correlation coefficient  $r$  between the fractions of VOIs and RP lesion in the quadrants;
6. Average GS of True Positive VOIs / Average GS of False Positive VOIs

**Supplementary Table S3.** ADC thresholds for determining volumes at intermediate risk (PZ/TZ=1100/850  $\mu\text{m}^2/\text{s}$ )

| PZ   | TZ | Statistics                                  | 900      | 950       | 1000      | 1050      | 1100      | 1150      | 1200      |
|------|----|---------------------------------------------|----------|-----------|-----------|-----------|-----------|-----------|-----------|
| 800  |    | Spearman's $\rho$                           | 0.671    | 0.714     | 0.686     | 0.704     | 0.761     | 0.704     | 0.697     |
|      |    | p-value                                     | 3.90E-08 | 1.94E-09  | 1.39E-08  | 4.16E-09  | 3.83E-11  | 4.05E-09  | 6.76E-09  |
|      |    | Volume  (cc)                                | 0.356    | 0.378     | 0.407     | 0.438     | 0.494     | 0.607     | 0.795     |
|      |    | True Positive/False Negative/False Positive | 17/37/1  | 18/36/2   | 18/36/3   | 20/35/2   | 23/31/2   | 24/30/7   | 24/31/9   |
|      |    | Pearson's r                                 | 0.899    | 0.894     | 0.895     | 0.900     | 0.892     | 0.909     | 0.928     |
|      |    | GS True Positive / GS False Positive        | 7.71/6.3 | 7.67/6.31 | 7.67/6.26 | 7.55/6.28 | 7.57/6.59 | 7.42/6.52 | 7.21/6.62 |
| 850  |    | Spearman's $\rho$                           | 0.714    | 0.755     | 0.729     | 0.750     | 0.778     | 0.722     | 0.703     |
|      |    | p-value                                     | 1.94E-09 | 6.42E-11  | 6.11E-10  | 1.06E-10  | 7.13E-12  | 1.06E-09  | 4.24E-09  |
|      |    | Volume  (cc)                                | 0.510    | 0.532     | 0.561     | 0.592     | 0.649     | 0.767     | 0.952     |
|      |    | True Positive/False Negative/False Positive | 19/35/0  | 19/35/1   | 18/36/3   | 20/34/2   | 24/30/2   | 26/29/7   | 27/28/8   |
|      |    | Pearson's r                                 | 0.901    | 0.904     | 0.915     | 0.917     | 0.900     | 0.909     | 0.917     |
|      |    | GS True Positive / GS False Positive        | 7.79/6.3 | 7.79/6.35 | 7.78/6.3  | 7.65/6.52 | 7.62/6.61 | 7.54/6.53 | 7.3/6.62  |
| 900  |    | Spearman's $\rho$                           |          | 0.769     | 0.745     | 0.766     | 0.738     | 0.747     | 0.710     |
|      |    | p-value                                     |          | 1.71E-11  | 1.54E-10  | 2.27E-11  | 2.83E-10  | 1.28E-10  | 2.63E-09  |
|      |    | Volume  (cc)                                |          | 0.712     | 0.744     | 0.777     | 0.840     | 0.956     | 1.133     |
|      |    | True Positive/False Negative/False Positive |          | 20/35/2   | 19/35/3   | 22/33/2   | 24/30/5   | 27/28/7   | 28/27/8   |
|      |    | Pearson's r                                 |          | 0.922     | 0.927     | 0.915     | 0.914     | 0.925     | 0.925     |
|      |    | GS True Positive / GS False Positive        |          | 7.8/6.36  | 7.79/6.32 | 7.64/6.32 | 7.67/6.64 | 7.48/6.57 | 7.29/6.57 |
| 950  |    | Spearman's $\rho$                           |          |           | 0.740     | 0.723     | 0.701     | 0.733     | 0.698     |
|      |    | p-value                                     |          |           | 2.46E-10  | 9.45E-10  | 5.13E-09  | 4.52E-10  | 6.22E-09  |
|      |    | Volume  (cc)                                |          |           | 0.929     | 0.964     | 1.028     | 1.147     | 1.322     |
|      |    | True Positive/False Negative/False Positive |          |           | 22/33/3   | 22/33/4   | 25/29/5   | 29/26/5   | 31/24/6   |
|      |    | Pearson's r                                 |          |           | 0.920     | 0.936     | 0.923     | 0.932     | 0.926     |
|      |    | GS True Positive / GS False Positive        |          |           | 7.59/6.27 | 7.59/6.3  | 7.6/6.55  | 7.41/6.6  | 7.26/6.6  |
| 1000 |    | Spearman's $\rho$                           |          |           |           | 0.708     | 0.670     | 0.732     | 0.694     |
|      |    | p-value                                     |          |           |           | 2.97E-09  | 4.17E-08  | 4.64E-10  | 8.24E-09  |
|      |    | Volume  (cc)                                |          |           |           | 1.155     | 1.221     | 1.329     | 1.506     |
|      |    | True Positive/False Negative/False Positive |          |           |           | 24/31/3   | 28/27/4   | 30/26/4   | 33/23/3   |
|      |    | Pearson's r                                 |          |           |           | 0.940     | 0.930     | 0.933     | 0.921     |
|      |    | GS True Positive / GS False Positive        |          |           |           | 7.42/6.33 | 7.43/6.62 | 7.37/6.54 | 7.24/6.63 |

The following six parameters were calculated for each tested pair of PZ/TZ thresholds:

1. Spearman correlation coefficient  $\rho$  between the size of the resultant VOIs and GS of the corresponding RP lesion;
2. P-value of the Spearman's  $\rho$ ;
3. Average volume of VOIs;
4. True positive = VOI is matching RP lesion; False negative = there is no VOI that matches the RP lesion; False positive = there is no RP lesion that matches the VOI;
5. Pearson correlation coefficient  $r$  between the fractions of VOIs and RP lesion in the quadrants;
6. Average GS of True Positive VOIs / Average GS of False Positive VOIs

**Supplementary Table S4.** ADC thresholds for determining volumes at low risk (PZ/TZ=1300/1050  $\mu\text{m}^2/\text{s}$ )

| PZ \ TZ | Statistics                                  | 1100      | 1150      | 1200      | 1250      | 1300      | 1350      | 1400      |
|---------|---------------------------------------------|-----------|-----------|-----------|-----------|-----------|-----------|-----------|
| 1000    | Spearman's $\rho$                           | 0.670     | 0.732     | 0.694     | 0.713     | 0.641     | 0.632     | 0.671     |
|         | p-value                                     | 4.17E-08  | 4.64E-10  | 8.24E-09  | 2.14E-09  | 2.29E-07  | 3.78E-07  | 3.88E-08  |
|         | Volume  (cc)                                | 1.221     | 1.329     | 1.506     | 1.738     | 2.075     | 2.404     | 2.725     |
|         | True Positive/False Negative/False Positive | 30/25/2   | 34/23/4   | 37/21/3   | 32/24/4   | 35/25/4   | 32/26/5   | 25/30/6   |
|         | Pearson's r                                 | 0.911     | 0.900     | 0.893     | 0.904     | 0.876     | 0.871     | 0.860     |
|         | GS True Positive / GS False Positive        | 7.37/6.28 | 7.29/6.26 | 7.27/6.19 | 7.31/6.25 | 7.09/6.6  | 7.06/6.58 | 7.24/6.57 |
| 1050    | Spearman's $\rho$                           | 0.650     | 0.678     | 0.677     | 0.667     | 0.629     | 0.618     | 0.666     |
|         | p-value                                     | 1.43E-07  | 2.52E-08  | 2.67E-08  | 5.06E-08  | 4.64E-07  | 8.07E-07  | 5.21E-08  |
|         | Volume  (cc)                                | 1.438     | 1.552     | 1.728     | 2.014     | 2.296     | 2.616     | 2.938     |
|         | True Positive/False Negative/False Positive | 33/24/3   | 40/19/4   | 42/18/3   | 34/23/2   | 39/23/3   | 36/24/5   | 27/28/6   |
|         | Pearson's r                                 | 0.898     | 0.892     | 0.884     | 0.885     | 0.865     | 0.862     | 0.847     |
|         | GS True Positive / GS False Positive        | 7.3/6.25  | 7.15/6.26 | 7.17/6.17 | 7.18/6.3  | 7.08/6.52 | 6.97/6.62 | 7.19/6.57 |
| 1100    | Spearman's $\rho$                           |           | 0.661     | 0.663     | 0.631     | 0.616     | 0.638     | 0.673     |
|         | p-value                                     |           | 7.21E-08  | 6.35E-08  | 4.02E-07  | 9.00E-07  | 2.73E-07  | 3.49E-08  |
|         | Volume  (cc)                                |           | 1.844     | 2.024     | 2.267     | 2.552     | 2.870     | 3.190     |
|         | True Positive/False Negative/False Positive |           | 40/19/3   | 40/19/3   | 35/22/2   | 35/24/3   | 33/24/4   | 27/27/5   |
|         | Pearson's r                                 |           | 0.881     | 0.887     | 0.881     | 0.874     | 0.871     | 0.846     |
|         | GS True Positive / GS False Positive        |           | 7.08/6.26 | 7.1/6.26  | 7.2/6.23  | 7.14/6.54 | 7.12/6.5  | 7.15/6.63 |
| 1150    | Spearman's $\rho$                           |           |           | 0.685     | 0.643     | 0.638     | 0.661     | 0.673     |
|         | p-value                                     |           |           | 1.56E-08  | 2.12E-07  | 2.79E-07  | 7.16E-08  | 3.49E-08  |
|         | Volume  (cc)                                |           |           | 2.364     | 2.600     | 2.898     | 3.199     | 3.519     |
|         | True Positive/False Negative/False Positive |           |           | 37/21/3   | 34/21/2   | 34/25/4   | 29/28/6   | 27/27/7   |
|         | Pearson's r                                 |           |           | 0.905     | 0.898     | 0.872     | 0.886     | 0.851     |
|         | GS True Positive / GS False Positive        |           |           | 7.14/6.29 | 7.21/6.24 | 7.15/6.56 | 7.17/6.54 | 7.15/6.63 |
| 1200    | Spearman's $\rho$                           |           |           |           | 0.642     | 0.610     | 0.651     | 0.659     |
|         | p-value                                     |           |           |           | 2.17E-07  | 1.27E-06  | 1.31E-07  | 8.10E-08  |
|         | Volume  (cc)                                |           |           |           | 2.963     | 3.260     | 3.573     | 3.898     |
|         | True Positive/False Negative/False Positive |           |           |           | 35/20/2   | 38/20/4   | 30/27/6   | 26/27/6   |
|         | Pearson's r                                 |           |           |           | 0.907     | 0.859     | 0.873     | 0.865     |
|         | GS True Positive / GS False Positive        |           |           |           | 7.17/6.25 | 7.05/6.5  | 7.13/6.56 | 7.12/6.59 |

The following six parameters were calculated for each tested pair of PZ/TZ thresholds:

1. Spearman correlation coefficient  $\rho$  between the size of the resultant VOIs and GS of the corresponding RP lesion;
2. P-value of the Spearman's  $\rho$ ;
3. Average volume of VOIs;
4. True positive = VOI is matching RP lesion; False negative = there is no VOI that matches the RP lesion; False positive = there is no RP lesion that matches the VOI;
5. Pearson correlation coefficient  $r$  between the fractions of VOIs and RP lesion in the quadrants;
6. Average GS of True Positive VOIs / Average GS of False Positive VOIs
